# Supplementary material for: Seasonal Changes in Trace-Element Content in the Coat of Hucul Horses
Source: MDPI journal article supplement (doi:10.3390/ani12202770), 2022-10-14
Supplement: s1 [file s1]

**Table S1.** R-Spearman correlation coefficients and p-value between micronutrients in the coat of Hucul horses in the summer season (s), above the diagonal for stable A and below for stable B.

|    | Fe                 | Cu                 | Mn                 | Zn                 | Al                 |
|----|--------------------|--------------------|--------------------|--------------------|--------------------|
| Fe |                    | 0.4550<br>p=0.0036 | 0.8060<br>p=0.0000 | ns                 | 0.9699<br>p=0.0000 |
| Cu | 0.4550<br>p=0.0036 |                    | 0.5194<br>p=0.0007 | 0.7066<br>p=0.0000 | 0.4377<br>p=0.0053 |
| Mn | 0.5874<br>p=0.0000 | ns                 |                    | 0.6212<br>p=0.0000 | 0.8243<br>p=0.0000 |
| Zn | ns                 | 0.4653<br>p=0.0013 | ns                 |                    | 0.3195<br>p=0.0474 |
| Al | 0.9419<br>p=0.0000 | ns                 | 0.6467<br>p=0.0000 | 0.5666<br>p=0.0000 |                    |

ns – Spearman correlation coefficient value not statistically significant.

**Table S2.** R-Spearman correlation coefficients and p value between micronutrients in the coat of Hucul horses in the autumn season (a), above the diagonal for stable A and below for stable B.

|    | Fe                 | Cu                 | Mn                 | Zn                 | Al                 |
|----|--------------------|--------------------|--------------------|--------------------|--------------------|
| Fe |                    | 0.4690<br>p=0.0039 | 0.8118<br>p=0.000  | ns                 | 0.8792<br>p=0.0000 |
| Cu | 0.5221<br>p=0.0001 |                    | 0.4219<br>p=0.0104 | 0.4009<br>p=0.0154 | 0.4294<br>p=0.0090 |
| Mn | 0.8493<br>p=0.0000 | ns                 |                    | ns                 | ns                 |
| Zn | ns                 | 0.5132<br>p=0.0002 | ns                 |                    | 0.6789<br>p=0.0000 |
| Al | 0.8513<br>p=0.0000 | 0.3645<br>p=0.0109 | 0.6356<br>p=0.0000 | ns                 |                    |

ns – Spearman correlation coefficient value not statistically significant.

**Table S3.** R-Spearman correlation coefficients and p value between micronutrients in the coat of Hucul horses in the autumn season (a), above the diagonal for stable A and below for stable B.

|    | Fe                 | Cu                 | Mn                 | Zn                  | Al                 |
|----|--------------------|--------------------|--------------------|---------------------|--------------------|
| Fe |                    | 0.4284<br>p=0.0065 | ns                 | ns                  | 0.8318<br>p=0.0000 |
| Cu | ns                 |                    | 0.3927<br>p=0.0134 | ns                  | ns                 |
| Mn | 0.7482<br>p=0.0000 | ns                 |                    | -0.3557<br>p=0.0263 | ns                 |
| Zn | ns                 | 0.6732<br>p=0.0000 | ns                 |                     | ns                 |
| Al | 0.9015<br>p=0.0000 | ns                 | 0.6720<br>p=0.0000 | ns                  |                    |

ns – Spearman correlation coefficient value not statistically significant.
