# Supplementary material for: Seasonal Changes in Trace-Element Content in the Coat of Hucul Horses
Source: MDPI journal article supplement (doi:10.3390/ani12202770), 2022-10-14
Supplement: s1 [file s1]

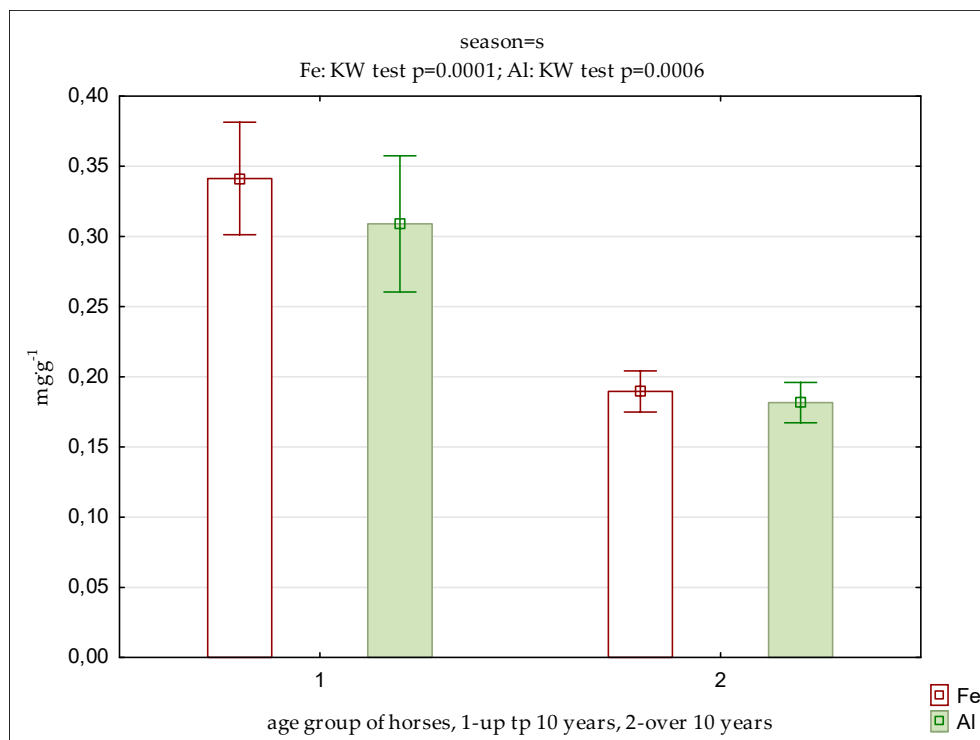

**Figure S1.** The level of selected micronutrients according to the age of the horses in the summer season, for which the significance of differences was confirmed by the Kruskal-Wallis test.

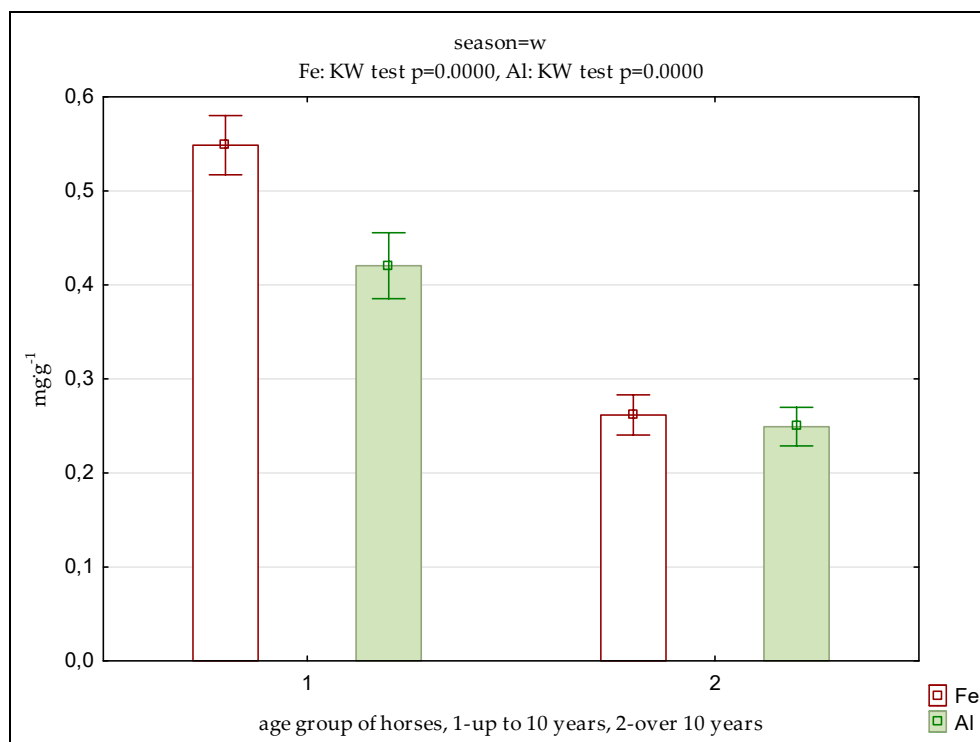

**Figure S2.** The level of selected micronutrients according to the age of the horses in the winter season, for which the significance of differences was confirmed by the Kruskal-Wallis test.
